# Supplementary material for: Cyclin-dependent kinase regulates the length of S phase through TICRR/TRESLIN phosphorylation
Source: PubMed Central journal article supplement — Genes Dev. 2015 Mar 1;29(5):555–66. doi: 10.1101/gad.246827.114 (PMC4358407; doi:10.1101/gad.246827.114), 2015-03-01

**Supplemental Figure 1: Expression of siRNA-resistant TICRR in transgenic cell lines.**

Immunoblotting of TICRR protein expression levels in U2OS control and TICRR transgenic lines transfected with control siRNA (C; lanes 1,3,5,7) or TICRR siRNA (T; lanes 2,4,6,8). Lighter (top) and darker (bottom) exposures.

**Supplemental Figure 2: Truncations of TICRR<sup>TESE</sup> do not stimulate DNA replication.**

(A) Schematic of full-length TICRR and TICRR<sup>TESE</sup> protein (top); EGFP-TICRR 954-1016 truncation (middle), and the  $\Delta$ M domain truncations (bottom). (B) Immunoblot showing EGFP-TICRR (954-1016) (lane 1) and TICRR<sup>TESE</sup> (954-1016)(lane2) protein expression (left panel, anti-GFP) and TICRR  $\Delta$ M domain truncations (right, lanes 4,5). Histone H3 and TOP2 $\alpha$  are shown as loading controls. (C) Quantification of mean EdU signal intensity from EdU FACS profiles normalized to U2OS control. Error bars represent standard deviation.

**Supplemental Figure 3: DNA content profiles are altered in Ticrr<sup>TESE</sup> cells.**

Flow cytometry data of propidium iodide stained U2OS, TICRR<sup>WT</sup>, and Ticrr<sup>TESE</sup> cells were analyzed for DNA content. Ticrr<sup>TESE</sup> cells display a reduction in the percent of cells in S phase compared to U2OS and TICRR<sup>WT</sup> (A) and an increase in the percent of cells in G1 (B).

Sansam\_Fig. S1

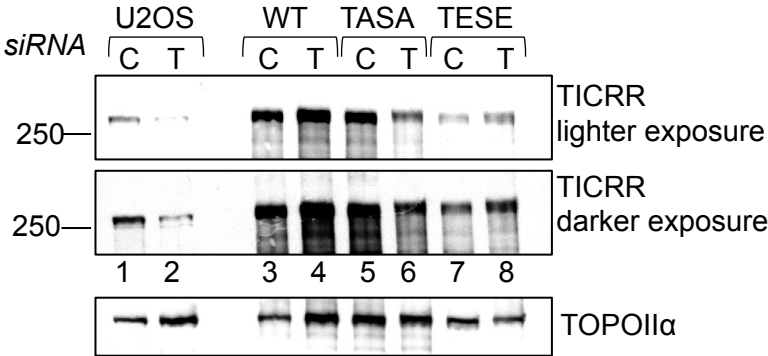

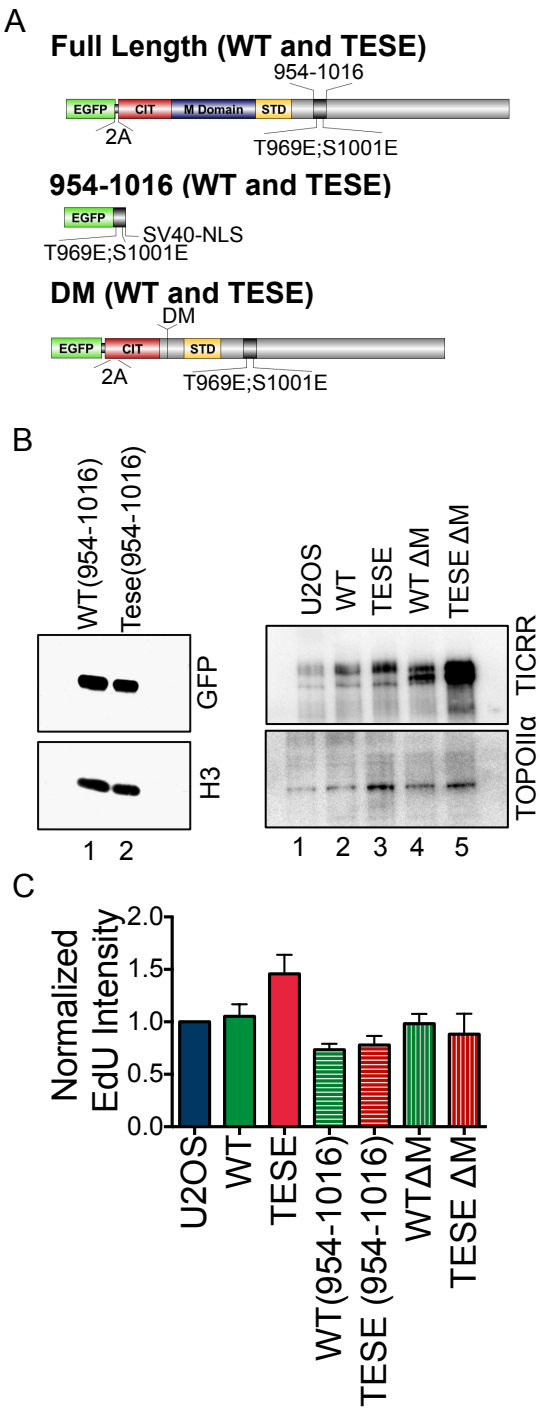

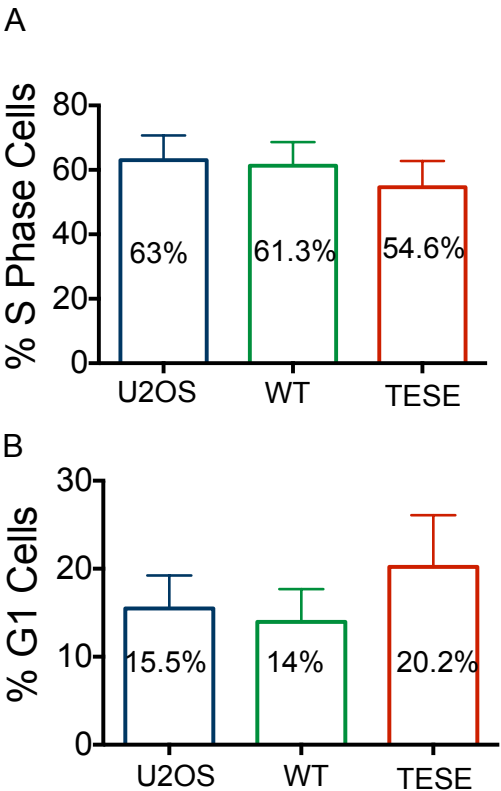

Supplement: supp_29.5.555_Supplemental_text_and_figures.pdf [file supp_29.5.555_Supplemental_text_and_figures.pdf]
